# Supplementary material for: Based on Network Pharmacology to Explore the Molecular Mechanism of Buzhong Yiqi Decoction for the Treatment of Gastric Cancer
Source: Research Square preprint supplement (doi:10.21203/rs.3.rs-1098024/v1), 2021-11-30
Supplement: Supplementary file 1 [file 05b1696dbf5b0b9a51a6582a.xlsx]

## Sheet: Sheet1
Table 4: Binding free energy for MAPK3-Naringenin
Energy Component	Average	Std. Dev.	Std. Err. of Mean
VDWAALS	-30.0636	3.104	0.6087
EEL	-26.1589	7.5989	1.4903
EGB	37.3531	7.0345	1.3796
ESURF	-4.7828	0.2526	0.0495
DELTA G gas	-58.2226	8.349	1.6374
DELTA G solv	32.5704	6.9766	1.3682
DELTA TOTAL	-25.6522	4.622	0.9065
