# Supplementary material for: Based on Network Pharmacology to Explore the Molecular Mechanism of Buzhong Yiqi Decoction for the Treatment of Gastric Cancer
Source: Research Square preprint supplement (doi:10.21203/rs.3.rs-1098024/v1), 2021-11-30
Supplement: Supplementary file 2 [file 0947cf7a6578ea3fe2c8957e.xlsx]

## Sheet: Sheet1
Table 2: Information of Top 20 of signaling pathways.
ID	Description	Gene ID	Count
hsa05200	Pathways in cancer	AKT1/BIRC5/AR/BAD/BAX/CCND1/BCL2/BCL2L1/CASP3/CASP8/CASP9/CDK4/CDKN1A/CDKN2A/CHUK/E2F1/E2F2/	58
		EGF/EGFR/ERBB2/FOS/GSK3B/GSTP1/HIF1A/HSP90AA1/HSP90AB1/IKBKB/IL6/CXCL8/JUN/MET/MMP1/MMP2/MMP9/MYC/NFKBIA/NOS2/PPARD/PPARG/PRKACA/PRKCA/MAPK1/MAPK3/MAPK8/MAPK10/PTEN/PTGS2/RAF1/RB1/RELA/RXRA/RXRB/STAT1/STAT3/TGFB1/TP53/VEGFA/RASSF1
hsa05161	Hepatitis B	AKT1/BIRC5/BAD/BAX/CCND1/BCL2/CASP3/CASP8/CASP9/CCNA2/CDK4/CDKN1A/CHUK/CREB1/MAPK14/E2F1/E2F2/FASN/FOS/IKBKB/IL6/CXCL8/JUN/MMP9/MYC/NFKBIA/PRKCA/MAPK1/MAPK3/MAPK8/MAPK10/PTEN/RAF1/RB1/	41
		RELA/MAP2K4/STAT1/STAT3/TGFB1/TNF/TP53
hsa04151	PI3K-Akt signaling pathway	AKT1/BAD/CCND1/BCL2/BCL2L1/CASP9/CDK4/CDKN1A/CHUK/COL1A1/CREB1/EGF/EGFR/ERBB2/ERBB3/GSK3B/	40
		HSP90AA1/HSP90AB1/IGF2/IKBKB/IL2/IL4/IL6/INSR/KDR/MET/MYC/NOS3/PIK3CG/PRKCA/MAPK1/MAPK3/PTEN/
		RAF1/RELA/RXRA/SPP1/TIMP1/TP53/VEGFA
hsa05160	Hepatitis C	AKT1/BAD/BAX/CCND1/CASP3/CASP8/CASP9/CDK4/CDKN1A/CHUK/CLDN4/MAPK14/E2F1/E2F2/EGF/EGFR/FASN/	36
		GSK3B/IFNG/IKBKB/CXCL8/IRF1/MYC/NFKBIA/MAPK1/MAPK3/MAPK8/MAPK10/RAF1/RB1/RELA/RXRA/STAT1/
		STAT3/TNF/TP53
hsa05418	Fluid shear stress and atherosclerosis	AKT1/BCL2/CAV1/CHUK/MAPK14/NQO1/FOS/GSTM1/GSTP1/HMOX1/HSP90AA1/HSP90AB1/ICAM1/IFNG/IKBKB/	31
		IL1A/IL1B/JUN/KDR/MMP2/MMP9/NFE2L2/NOS3/MAPK8/MAPK10/RELA/CCL2/MAP2K4/TNF/TP53/VEGFA
hsa05205	Proteoglycans in cancer	AKT1/CCND1/CASP3/CAV1/CDKN1A/MAPK14/EGFR/ERBB2/ERBB3/ESR1/FASN/HIF1A/IGF2/IL6/KDR/MET/MMP2/	30
		MMP9/MYC/PLAU/PRKACA/PRKCA/MAPK1/MAPK3/RAF1/STAT3/TGFB1/TNF/TP53/VEGFA
hsa04933	AGE-RAGE signaling pathway in diabetic complications	AKT1/BAX/CCND1/BCL2/CASP3/CDK4/COL1A1/MAPK14/F3/ICAM1/IL1A/IL1B/IL6/CXCL8/JUN/MMP2/NOS3/	30
		SERPINE1/PRKCA/MAPK1/MAPK3/MAPK8/MAPK10/RELA/CCL2/STAT1/STAT3/TGFB1/TNF/VEGFA
hsa05215	Prostate cancer	AKT1/AR/BAD/CCND1/BCL2/CASP9/CDKN1A/CHUK/CREB1/E2F1/E2F2/EGF/EGFR/ERBB2/GSK3B/GSTP1/HSP90AA1/	27
		HSP90AB1/IKBKB/NFKBIA/MAPK1/MAPK3/PTEN/RAF1/RB1/RELA/TP53
hsa04657	IL-17 signaling pathway	CASP3/CASP8/CHUK/MAPK14/FOS/GSK3B/HSP90AA1/HSP90AB1/IFNG/IKBKB/IL1B/IL4/IL6/CXCL8/JUN/MMP1/MMP3/MMP9/NFKBIA/MAPK1/MAPK3/MAPK8/MAPK10/PTGS2/RELA/CCL2/TNF	27
hsa01522	Endocrine resistance	AKT1/BAD/BAX/CCND1/BCL2/CDK4/CDKN1A/CDKN2A/MAPK14/E2F1/E2F2/EGFR/ERBB2/ESR1/ESR2/FOS/JUN/	27
		MMP2/MMP9/PRKACA/MAPK1/MAPK3/MAPK8/MAPK10/RAF1/RB1/TP53
hsa04668	TNF signaling pathway	AKT1/CASP3/CASP8/CHUK/CREB1/MAPK14/FASN/FOS/ICAM1/IKBKB/IL1B/IL6/IRF1/JUN/MMP3/MMP9/NFKBIA/	26
		MAPK1/MAPK3/MAPK8/MAPK10/PTGS2/RELA/CCL2/MAP2K4/TNF
hsa05212	Pancreatic cancer	AKT1/BAD/CCND1/BCL2L1/CASP9/CDK4/CDKN2A/CHUK/E2F1/E2F2/EGF/EGFR/ERBB2/IKBKB/MAPK1/MAPK3/	26
		MAPK8/MAPK10/RAF1/RB1/RELA/STAT1/STAT3/TGFB1/TP53/VEGFA
hsa04659	Th17 cell differentiation	AHR/CHUK/MAPK14/FOS/HIF1A/HSP90AA1/HSP90AB1/IFNG/IKBKB/IL1B/IL2/IL4/IL6/JUN/NFKBIA/MAPK1/MAPK3/	25
		MAPK8/MAPK10/RELA/RXRA/RXRB/STAT1/STAT3/TGFB1
hsa04010	MAPK signaling pathway	AKT1/CASP3/CHUK/MAPK14/EGF/EGFR/FOS/HSPB1/IKBKB/IL1A/IL1B/JUN/MYC/PRKACA/PRKCA/MAPK1/MAPK3/	25
		MAPK8/MAPK10/RAF1/RELA/MAP2K4/TGFB1/TNF/TP53
hsa04210	Apoptosis	PARP1/AKT1/BIRC5/BAD/BAX/BCL2/BCL2L1/CASP3/CASP8/CASP9/CHUK/CTSD/FOS/IKBKB/JUN/NFKBIA/MAPK1/	24
		MAPK3/MAPK8/MAPK10/RAF1/RELA/TNF/TP53
hsa04066	HIF-1 signaling pathway	AKT1/BCL2/CDKN1A/EGF/EGFR/ERBB2/F3/HIF1A/HK2/HMOX1/IFNG/IL6/INSR/NOS2/NOS3/SERPINE1/PRKCA/	23
		MAPK1/MAPK3/RELA/STAT3/TIMP1/VEGFA
hsa04068	Foxo signaling pathway	AKT1/CCND1/CAT/CCNB1/CDKN1A/CHUK/MAPK14/EGF/EGFR/IKBKB/IL6/IL10/INSR/MAPK1/MAPK3/MAPK8/	22
		MAPK10/PTEN/RAF1/STAT3/TGFB1/SIRT1
hsa05219	Bladder cancer	CCND1/CDK4/CDKN1A/CDKN2A/E2F1/E2F2/EGF/EGFR/ERBB2/CXCL8/MMP1/MMP2/MMP9/MYC/MAPK1/MAPK3/	21
		RAF1/RB1/TP53/VEGFA/RASSF1
hsa01521	EGFR tyrosine kinase inhibitor resistance	AKT1/BAD/BAX/BCL2/BCL2L1/EGF/EGFR/ERBB2/ERBB3/GSK3B/IL6/KDR/MET/PRKCA/MAPK1/MAPK3/PTEN/RAF1/	20
		STAT3/VEGFA
hsa04660	T cell receptor signaling pathway	AKT1/CD40LG/CDK4/CHUK/MAPK14/FOS/GSK3B/IFNG/IKBKB/IL2/IL4/IL10/JUN/NFKBIA/MAPK1/MAPK3/RAF1/	19
		RELA/TNF
