# Supplementary material for: Based on Network Pharmacology to Explore the Molecular Mechanism of Buzhong Yiqi Decoction for the Treatment of Gastric Cancer
Source: Research Square preprint supplement (doi:10.21203/rs.3.rs-1098024/v1), 2021-11-30
Supplement: Supplementary file 3 [file 31a12a355df1d7bc486d30a6.xlsx]

## Sheet: Sheet1
Table 3: Molecular docking results of key compounds and core target proteins.
Compounds	Binding energies (kcal/mol)
	AKT1	STAT3	TP53	MAPK1	MAPK3
Quercetin	-6.04	-5.57	-5.44	-6.04	-7.2
Kaempferol	-6.43	-5.59	-5.48	-7.92	-7.19
Nobiletin	-5.31	-4.67	-4.46	-4.7	-5.91
Naringenin	-6.45	-5.59	-5.88	-6.88	-8.08
Formononetin	-6.39	-6.64	-6.46	-6.9	-7.97
