# Supplementary material for: Based on Network Pharmacology to Explore the Molecular Mechanism of Buzhong Yiqi Decoction for the Treatment of Gastric Cancer
Source: Research Square preprint supplement (doi:10.21203/rs.3.rs-1098024/v1), 2021-11-30
Supplement: Supplementary file 4 [file d93731aeb341f66dda5db67a.xlsx]

## Sheet: Sheet1
Table 1: Top 10 basic information of ingredients in BZYQD by their degree values.
Molecule ID	Molecule name	Molecule structure	Degree	OB（％）	DL	Chinese medicine
MOL000098	Quercetin		104	46.43	0.28	Huangqi, Gancao, Chaihu
MOL000422	Kaempferol		58	41.88	0.24	Huangqi, Gancao, Chaihu, Renshen
MOL005828	Nobiletin		52	61.67	0.52	Chenpi
MOL004328	Naringenin		48	59.29	0.21	Chenpi, Gancao
MOL000392	Formononetin		37	69.67	0.21	Huangqi, Gancao, Chaihu
MOL000354	Isorhamnetin		35	49.6	0.31	Huangqi, Gancao, Chaihu
MOL000497	Licochalcone a		35	40.79	0.29	Gancao
MOL003896	7-Methoxy-2-methyl isoflavone		32	42.56	0.2	Gancao
MOL000378	7-O-methylisomucronulatol		32	74.69	0.3	Huangqi, Chaihu
MOL004959	1-Methoxyphaseollidin		29	69.98	0.64	Gancao
